# Supplementary material for: Are droplets really suitable for single-cell analysis? A case study on yeast in droplets
Source: Royal Society of Chemistry journal article supplement (doi:10.1039/d1lc00469g), 2021-01-01
Supplement: d1lc00469g1.pdf [file d1lc00469g1.pdf]

## Supplementary Information for:

### Are droplets really suitable for single-cells analysis? A case study on yeast in droplets

Yuta Nakagawa,<sup>\*a</sup> Shinsuke Ohnuki,<sup>\*b</sup> Naoko Kondo,<sup>b</sup> Kaori Itto-Nakama,<sup>b</sup> Farzan Ghanegolmohammadi,<sup>b</sup> Akihiro Isozaki,<sup>#a</sup> Yoshikazu Ohya,<sup>#bc</sup> and Keisuke Goda<sup>#ade</sup>

<sup>a</sup>*Department of Chemistry, Graduate School of Science, The University of Tokyo, 7-3-1 Hongo, Bunkyo-ku, Tokyo 113-0033, Japan.*

<sup>b</sup>*Department of Integrated Biosciences, Graduate School of Frontier Sciences, The University of Tokyo, 5-1-5 Kashiwanoha, Kashiwa, Chiba 277-8562, Japan.*

<sup>c</sup>*Collaborative Research Institute for Innovative Microbiology, The University of Tokyo, 1-1-1 Yayoi, Bunkyo-ku, Tokyo 113-8654, Japan.*

<sup>d</sup>*Department of Bioengineering, Samueli School of Engineering, University of California, Los Angeles, 420 Westwood Plaza, California 90095, USA.*

<sup>e</sup>*Institute of Technological Sciences, Wuhan University, Wuhan, Hubei 430072, China.*

\*These authors contributed equally.

#Corresponding authors: [a\\_isoizaki@chem.s.u-tokyo.ac.jp](mailto:a_isoizaki@chem.s.u-tokyo.ac.jp), [ohya@edu.k.u-tokyo.ac.jp](mailto:ohya@edu.k.u-tokyo.ac.jp) and [goda@chem.s.u-tokyo.ac.jp](mailto:goda@chem.s.u-tokyo.ac.jp)

**Supplementary Note 1: Proliferation of budding yeast cells cultured in droplets**

To investigate whether the effect of the droplet size on cell activity can be seen based on probing the proliferation, we measured the biomass of budding yeast cells after they were encapsulated and cultured in 100-pL (~57  $\mu\text{m}$  in diameter), 500-pL (~100  $\mu\text{m}$  in diameter), and 1-nL (~125  $\mu\text{m}$  in diameter) droplets. Here, we used the volume of cells that occupy the droplets as a readout of the biomass of cells after the culture droplets. As shown in Fig. S4, the biomass linearly increased with the increase in droplet volume i.e., the volume of cell medium.

The biomass was measured by estimating the volume of droplets occupied by cells as described below. First, incubated droplets were collected via glass capillary tubes (VitroTubes 3520-100, VitroCom, USA) and imaged using a microscope (IX73, Olympus, Japan). Two-dimensional bright-field images were recorded using a scientific complementary metal-oxide semiconductor (sCMOS) camera (ORCA-Flash4.0 C11440, Hamamatsu Photonics, Japan). All recorded images were processed with ImageJ as follows. First, the area within droplets occupied by cells was measured. Second, from the measured area, the radius and the volume were estimated under the assumption that the cells accumulated inside a droplet spherically. At least 185 cell-encapsulating droplets were analyzed for each droplet volume.

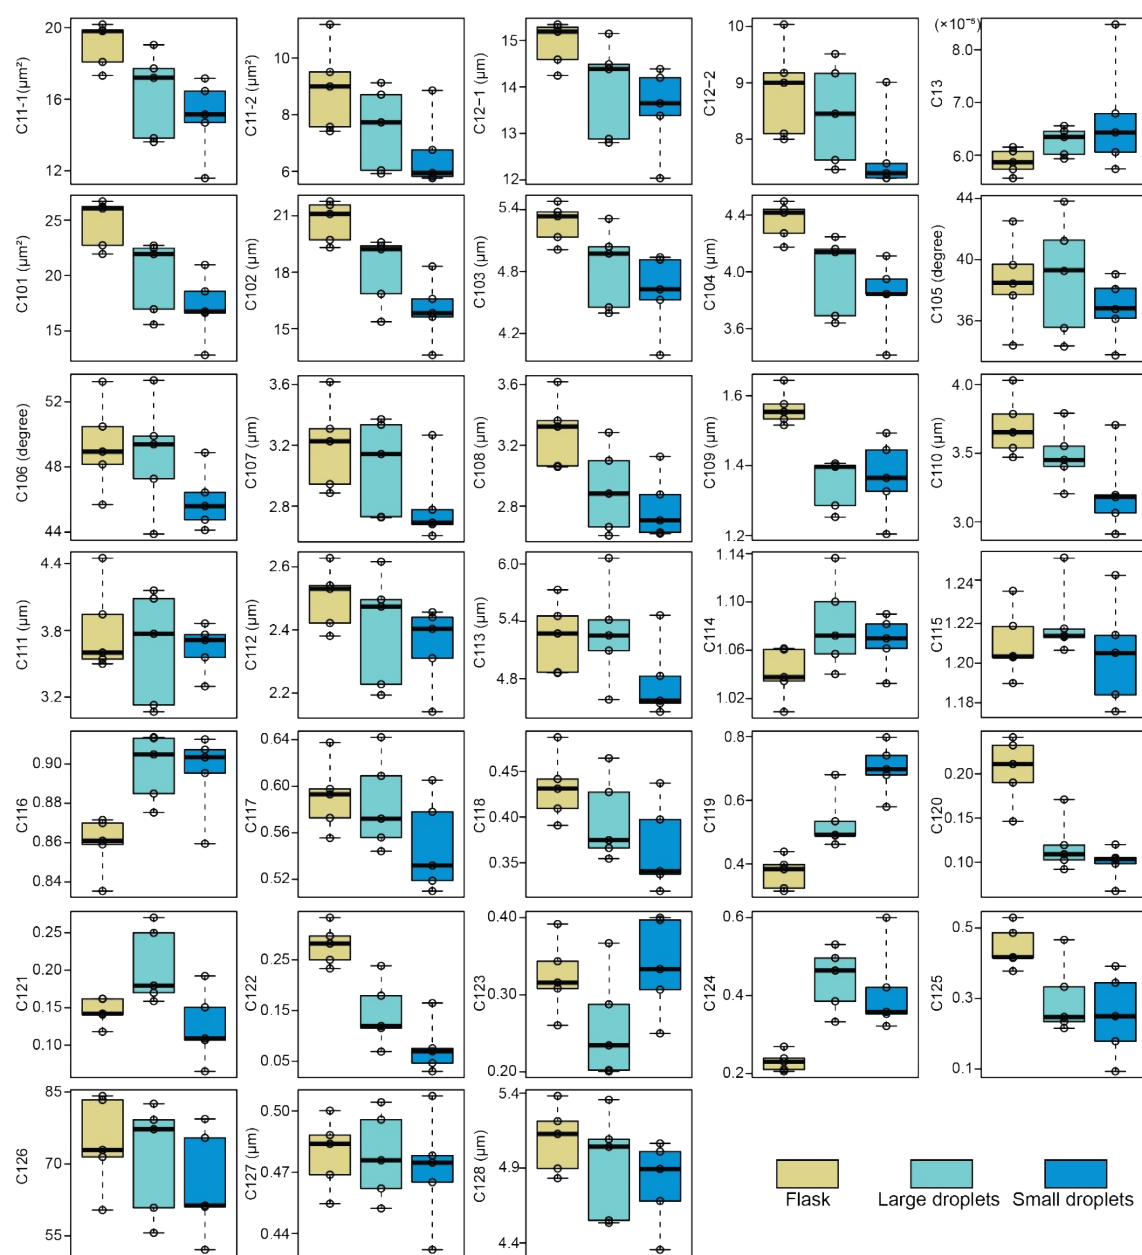

**Fig. S1 Measured morphological features of cells cultured in a flask, large droplets, and small droplets.**  
The descriptions of all parameters are shown in Table S1.

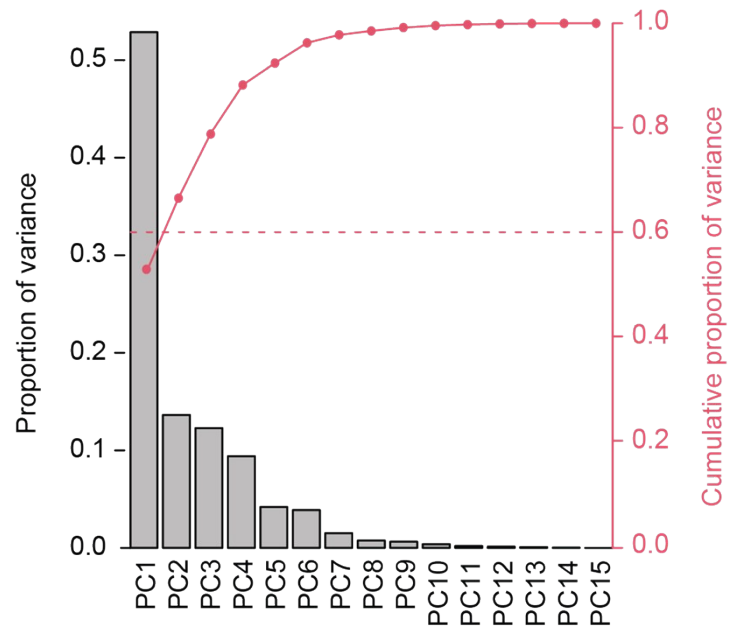

**Fig. S2 Cumulative contribution ratio of principal components.** The first 15 principal components are shown. PC1 and PC2, which accounted for the most significant contribution to variability, were used for further morphological analysis.

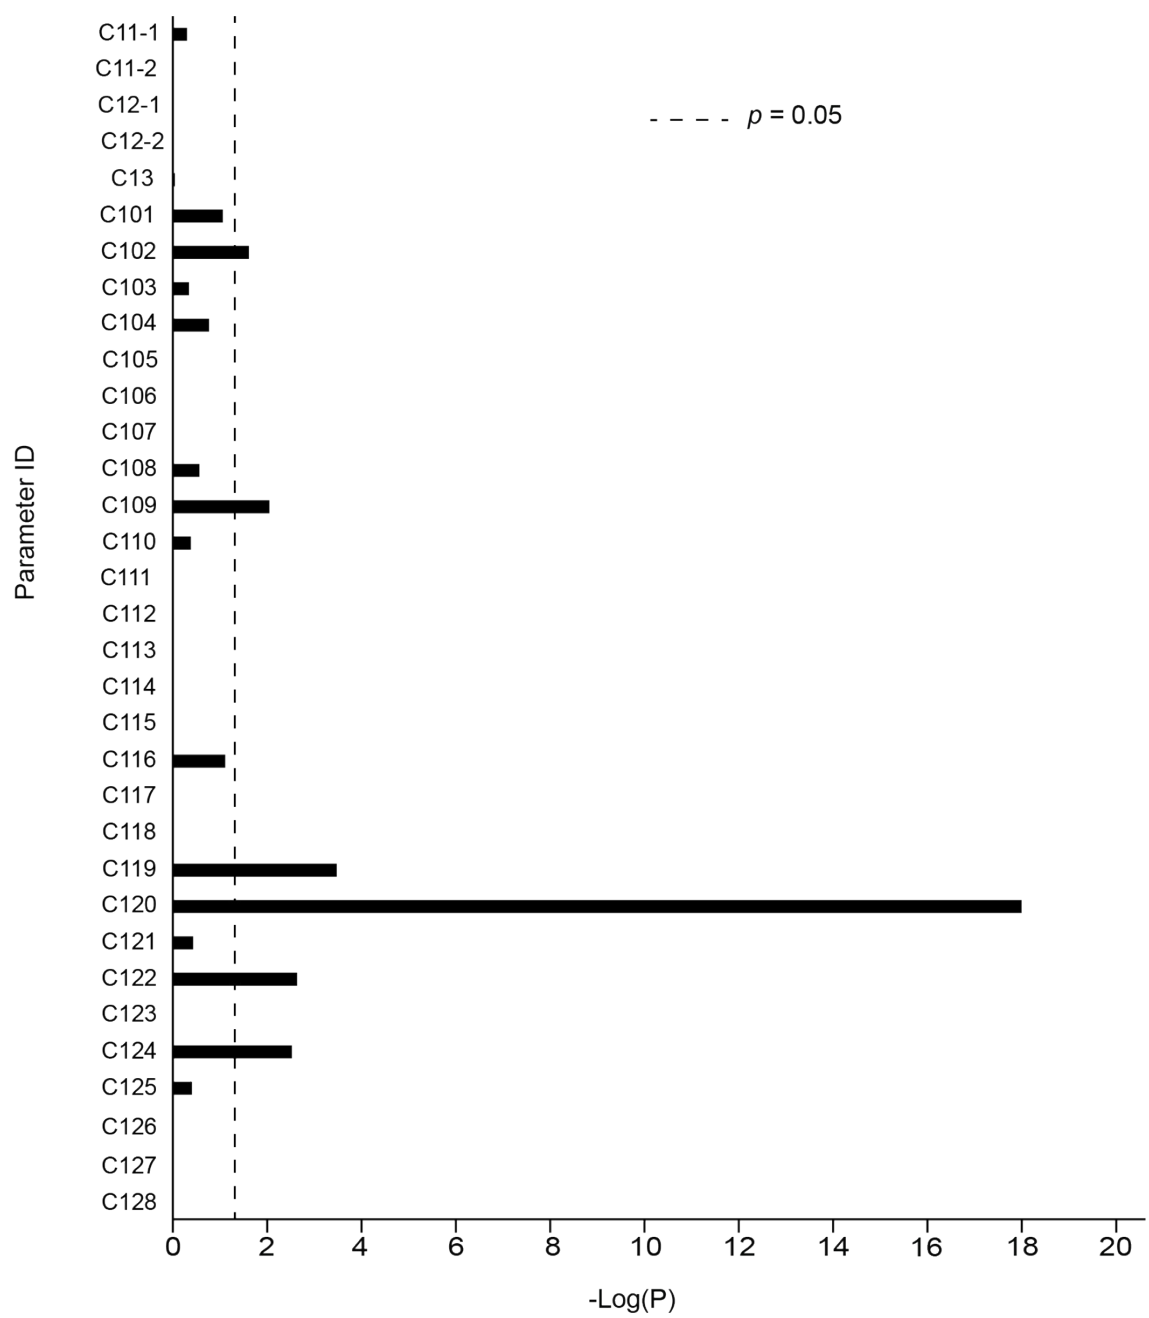

**Fig. S3** p-values of the morphological parameters for the likelihood ratio test of ANOVA.

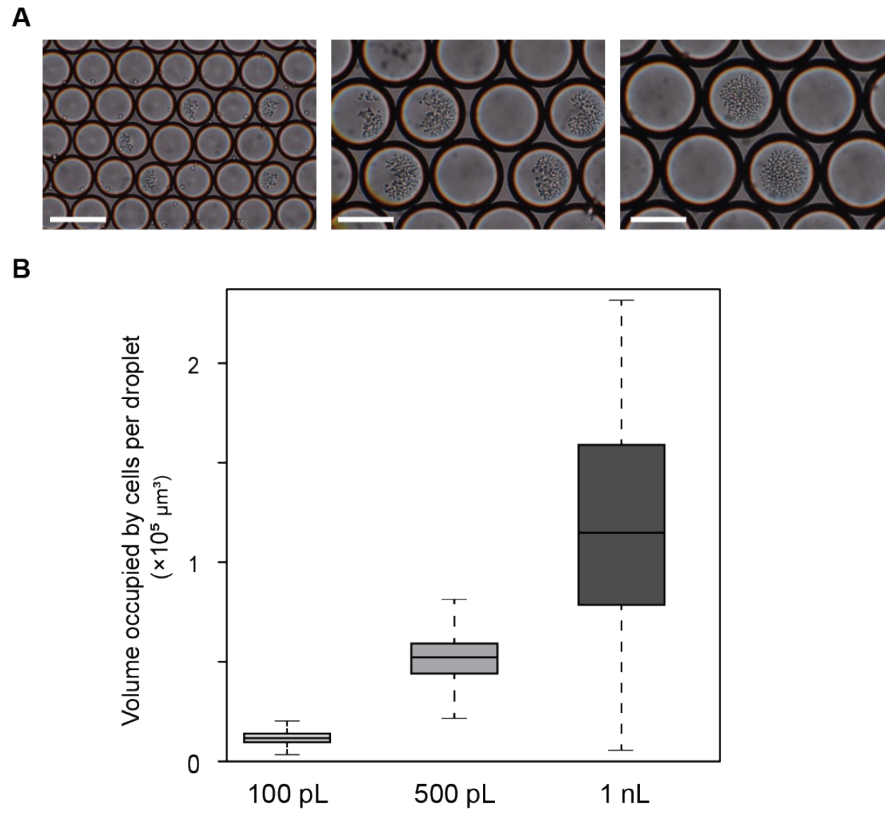

**Fig. S4 Biomass of budding yeast cells cultured in different sizes of droplets.** **A** Images of cells cultured for 15 hours in different sizes of droplets. Images of 100-pL, 500-pL, and 1-nL droplets are shown from the left. Scale bars, 100  $\mu\text{m}$ . **B** Quantified biomass of cells cultured in 100-pL, 500-pL, and 1-nL droplets.

**Table S1 Morphological parameters measured by CalMorph.** A complete catalog of morphological parameters and their descriptions are available in a previously reported work<sup>60</sup>.

| ID    | Descriptions                                                                                                 |
|-------|--------------------------------------------------------------------------------------------------------------|
| C11-1 | The size of the mother cell                                                                                  |
| C11-2 | The size of the bud                                                                                          |
| C12-1 | The outline length of the mother cell                                                                        |
| C12-2 | The outline length of the bud                                                                                |
| C13   | The fitness of the mother cell for an ellipse                                                                |
| C101  | The size of whole cell                                                                                       |
| C102  | The length of the outline of whole cell                                                                      |
| C103  | The length of the long axis of the mother cell                                                               |
| C104  | The length of the short axis of the mother cell                                                              |
| C105  | The position of the neck                                                                                     |
| C106  | The direction of the bud                                                                                     |
| C107  | The length of the long axis of the bud                                                                       |
| C108  | The length of the short axis of the bud                                                                      |
| C109  | The width of the neck                                                                                        |
| C110  | The distance between the bud tip and the long axis of the mother cell                                        |
| C111  | The distance between the bud tip and the short axis of mother cell                                           |
| C112  | The distance between the middle point of the neck and the mother cell                                        |
| C113  | The distance between the bud tip and the long axis of the mother cell passing through the middle of the neck |
| C114  | The ratio of bud axes                                                                                        |
| C115  | The ratio of the axes of the mother cell                                                                     |
| C116  | The ratio of the axis ratio of the mother cell and bud                                                       |
| C117  | The ratio of the outlines of the mother cell and bud                                                         |
| C118  | The ratio of the sizes of the mother cell and bud                                                            |
| C119  | The ratio of unbudded cells to all cells                                                                     |
| C120  | The ratio of small-budded cells to all cells                                                                 |
| C121  | The ratio of medium-budded cells to all cells                                                                |
| C122  | The ratio of large-budded cells to all cells                                                                 |
| C123  | The ratio of small-budded cells all budded cells                                                             |
| C124  | The ratio of medium-budded cells to all budded cells                                                         |
| C125  | The ratio of large-budded cells to all budded cells                                                          |
| C126  | The brightness differences of the cell wall                                                                  |
| C127  | The thickness differences of the cell wall                                                                   |
| C128  | The distance between the middle point of the neck and the mother cell                                        |

**Table S2 p-values of the morphological parameters for the likelihood ratio test of ANOVA.**

| ID    | p-value after Bonferroni correction |
|-------|-------------------------------------|
| C11-1 | 0.503                               |
| C11-2 | 1.00                                |
| C12-1 | 1.00                                |
| C12-2 | 1.00                                |
| C13   | 0.906                               |
| C101  | 0.087                               |
| C102  | 0.024                               |
| C103  | 0.455                               |
| C104  | 0.171                               |
| C105  | 1.00                                |
| C106  | 1.00                                |
| C107  | 1.00                                |
| C108  | 0.274                               |
| C109  | 0.009                               |
| C110  | 0.417                               |
| C111  | 1.00                                |
| C112  | 1.00                                |
| C113  | 1.00                                |
| C114  | 1.00                                |
| C115  | 1.00                                |
| C116  | 0.078                               |
| C117  | 1.00                                |
| C118  | 1.00                                |
| C119  | $3.35 \times 10^{-4}$               |
| C120  | $1.01 \times 10^{-18}$              |
| C121  | 0.371                               |
| C122  | 0.002                               |
| C123  | 1.00                                |
| C124  | 0.003                               |
| C125  | 0.393                               |
| C126  | 1.00                                |
| C127  | 1.00                                |
| C128  | 1.00                                |



**Table S3 Conditions for generating droplets of different sizes.** Droplets were generated using flow-focusing devices previously reported<sup>36</sup>.

| Droplet size (pL) | Microchannel height (μm) | Cell concentration (cells/mL) | Flow rate of cell medium (μL/min) | Flow rate of oil (μL/min) |
|-------------------|--------------------------|-------------------------------|-----------------------------------|---------------------------|
| 40                | 39-41                    | $2.5 \times 10^6$             | 15                                | 35                        |
| 100               | 48-51                    | $1.0 \times 10^6$             | 10                                | 30                        |
| 500               | 111-112                  | $2.0 \times 10^5$             | 10                                | 30                        |
| 1000              | 111-112                  | $1.0 \times 10^5$             | 30                                | 80                        |

**Table S4. Probability distribution functions and link functions for 33 parameters.** PDF: probability distribution function; asis: CalMorph parameter outputs were used as is; count-back: CalMorph parameter outputs were converted from the ratio to the number of cells; inverse: CalMorph parameter outputs were converted to the inverse.

| ID    | Transformation function | PDF           | Link function $\eta$ for location $\theta$ | Link function $\varepsilon$ for scale $\sigma$ |
|-------|-------------------------|---------------|--------------------------------------------|------------------------------------------------|
| C11-1 | asis                    | gamma         | log                                        | log                                            |
| C11-2 | asis                    | gamma         | log                                        | log                                            |
| C12-1 | asis                    | gamma         | log                                        | log                                            |
| C12-2 | asis                    | gamma         | log                                        | log                                            |
| C13   | asis                    | gamma         | log                                        | log                                            |
| C101  | asis                    | gamma         | log                                        | log                                            |
| C102  | asis                    | gamma         | log                                        | log                                            |
| C103  | asis                    | gamma         | log                                        | log                                            |
| C104  | asis                    | gamma         | log                                        | log                                            |
| C105  | asis                    | gamma         | log                                        | log                                            |
| C106  | asis                    | gamma         | log                                        | log                                            |
| C107  | asis                    | gamma         | log                                        | log                                            |
| C108  | asis                    | gamma         | log                                        | log                                            |
| C109  | asis                    | gamma         | log                                        | log                                            |
| C110  | asis                    | gamma         | log                                        | log                                            |
| C111  | asis                    | gamma         | log                                        | log                                            |
| C112  | asis                    | gamma         | log                                        | log                                            |
| C113  | asis                    | inverse gamma | log                                        | log                                            |
| C114  | asis                    | gamma         | log                                        | log                                            |
| C115  | inverse                 | beta          | logit                                      | logit                                          |
| C116  | asis                    | gamma         | log                                        | log                                            |
| C117  | asis                    | beta          | logit                                      | logit                                          |
| C118  | asis                    | beta          | logit                                      | logit                                          |
| C119  | count-back              | beta binomial | logit                                      | log                                            |
| C120  | count-back              | beta binomial | logit                                      | log                                            |
| C121  | count-back              | beta binomial | logit                                      | log                                            |
| C122  | count-back              | beta binomial | logit                                      | log                                            |
| C123  | count-back              | beta binomial | logit                                      | log                                            |
| C124  | count-back              | binomial      | logit                                      | -                                              |
| C125  | count-back              | beta binomial | logit                                      | log                                            |
| C126  | asis                    | gamma         | log                                        | log                                            |
| C127  | asis                    | gamma         | log                                        | log                                            |
| C128  | asis                    | gamma         | log                                        | log                                            |
